# Supplementary material for: Ring-opening polymerisation of rac-lactide mediated by cationic zinc complexes featuring P-stereogenic bisphosphinimine ligands
Source: Royal Society of Chemistry journal article supplement (doi:10.1039/c2dt11954d), 2012-01-01
Supplement: c2dt11954d.pdf [file c2dt11954d.pdf]

**Ring-Opening Polymerisation of *rac*-Lactide Mediated by Cationic Zinc  
Complexes Featuring P-Stereogenic Bisphosphinimine Ligands**

Hongsui Sun, Jamie S. Ritch and Paul G. Hayes\*

**Electronic Supplementary Information**

**Kinetic plots for the complexes *rac*-6 and *meso*-6**

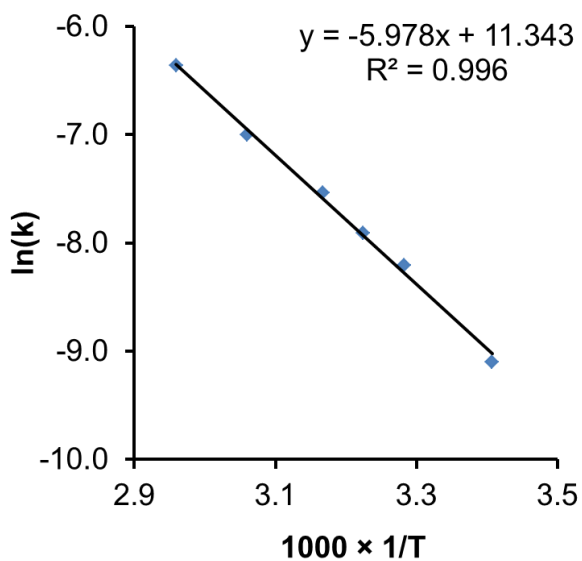

**Fig. S1.** Arrhenius plot [ $\ln(k)$  versus  $1000 \times 1/T$ ] for complex *rac*-6.

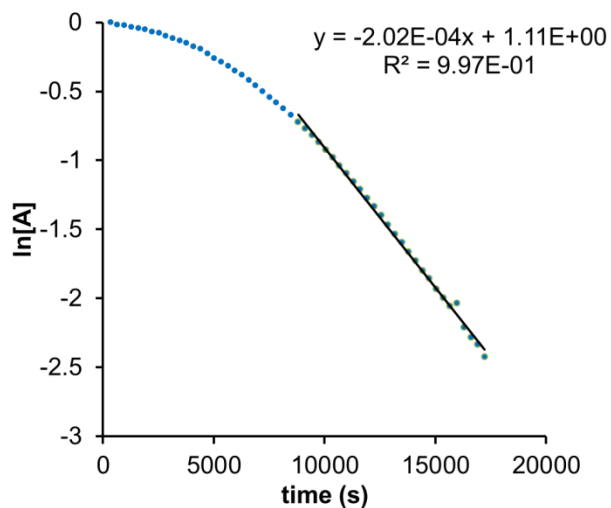

**Fig. S2.** Plot of  $\ln[A]$  versus T using *meso*-6 at 50 °C.

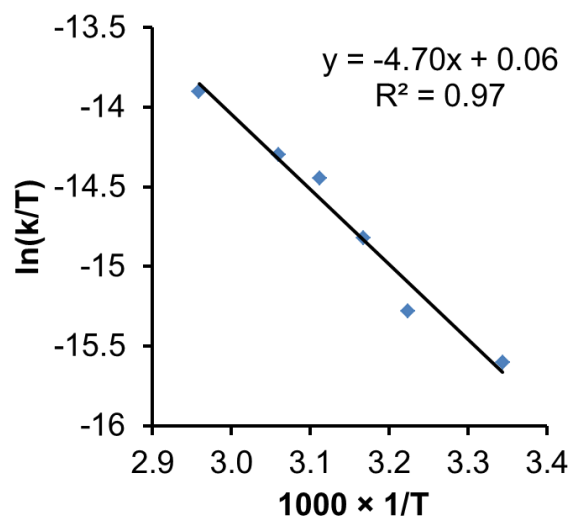

**Fig. S3.** Eyring plot [ $\ln(k/T)$  versus  $1000 \times 1/T$ ] for complex *meso*-6.

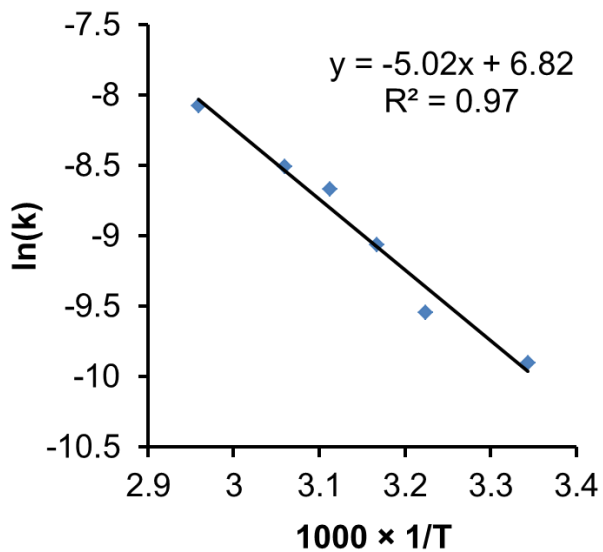

**Fig. S4.** Arrhenius plot [ $\ln(k)$  versus  $1000 \times 1/T$ ] for complex *meso*-6.
